# Supplementary material for: A Nectin1 Mutant Mouse Model Is Resistant to Pseudorabies Virus Infection
Source: MDPI journal article supplement (doi:10.3390/v14050874), 2022-04-22
Supplement: s1 [file s1]

## Supplementary figures

```

Pig      1  MARMGLAGAAGRWWGLALGLTAFFLPGAHTQVVQVNDSMYGFIGTDVVLHCSFANPLPGV  60
Cattle   1  MARMGLAGAAGRWWGLALGLTAFFLPGAQAQMVQVNDSMYGFIGTDVVLHCSFANPLPGV  60
Human    1  MARMGLAGAAGRWWGLALGLTAFFLPGVHSQVVQVNDSMYGFIGTDVVLHCSFANPLPSV  60
Mouse    1  MARMGLAGAAGRWWGLALGLTAFFLPGTHTQVVQVNDSMYGFIGTDVVLHCSFANPLPSV  60
          *****.:*:*****.*
Pig      61  KITQVTWQKATNGSKQNVAIYNPAMGVSVLAPYRERVEFLRPSFTDGTIRLSRLELEDEG  120
Cattle   61  KITQVTWQKATNGSKQNVAIYNPAMGVSVLAPYRERVEFLRPSFTDGTIRLSRLELEDEG  120
Human    61  KITQVTWQKSTNGSKQNVAIYNPSMGVSVLAPYRERVEFLRPSFTDGTIRLSRLELEDEG  120
Mouse    61  KITQVTWQKASNGSKQNMAIYNPTMGVSVLPPYEKRVEFLRPSFIDGTIRLSGLELEDEG  120
          *****.:*****:*****:*****.*.:***** *****
Pig      121  VYICEFATFPAGNRESQLNLTVMAPKPTNWIEGTQAVLRAKKGKDDKVLVATCTSANGKPP  180
Cattle   121  VYICEFATFPAGNRESQLNLTVMAPKPTNWIEGTHAVLRARKGQDEKVLVATCTSANGKPP  180
Human    121  VYICEFATFPTGNRESQLNLTVMAPKPTNWIEGTQAVLRAKKGQDDKVLVATCTSANGKPP  180
Mouse    121  MYICEFATFPTGNRESQLNLTVMAPKPTNWIEGTRAVLRARKGQDDKVLVATCTSANGKPP  180
          :*****:*****:*****:*****:*****:*****:*****
Pig      181  SVVSWETHLKGEAEYQEIRNPNGTVTVISRYRLVPSREDHRQSLACIVNYHMDRFRESLT  240
Cattle   181  SVVSWETRLKGEAEYQEIRNPNGTVTVISRYRLVPSREAHQSLACIVNYHMDRFWESLT  240
Human    181  SVVSWETRLKGEAEYQEIRNPNGTVTVISRYRLVPSREAHQQSLACIVNYHMDRFKESLT  240
Mouse    181  SAVSWETRLKGEAEYQEIRNPNGTVTVISRYRLVPSREAHQSLACIVNYHLDRFRESLT  240
          *.*****:*****:*****:*****:*****:*****:*****

```

**Figure S1.** Conservation of Nectin1 F129 residues across different mammalian species. Sequences were aligned with CLUSTALW. F129 residues are shown in red letters. Identical residues in all aligned sequences are denoted by asterisks.

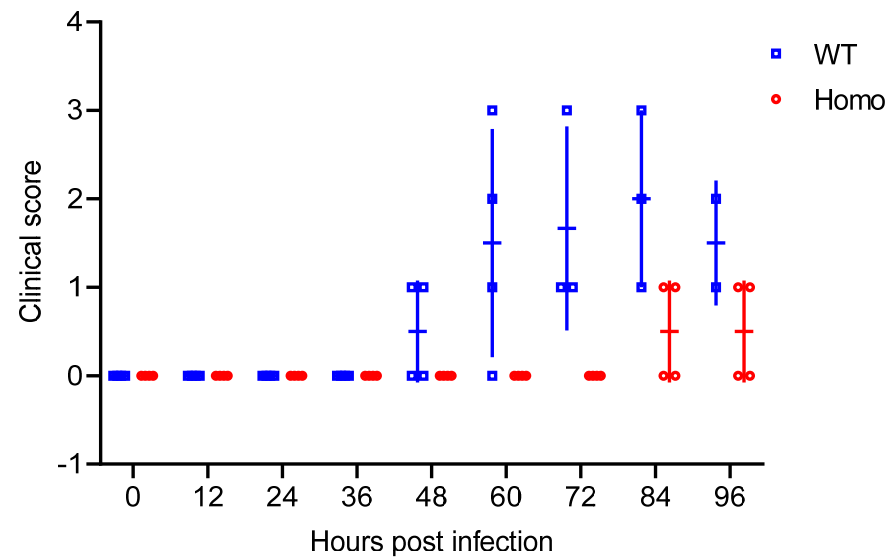

**Figure S2.** Clinical score for WT and homozygous (Homo) nectin1 F129A mutant mice following PRV infection in experiment 1.

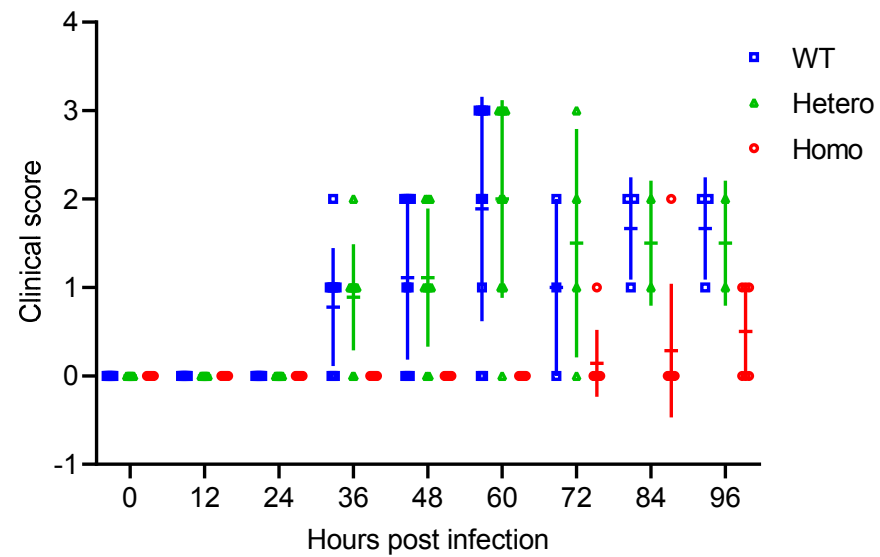

**Figure S3.** Clinical score for WT, heterozygous (Hetero), and homozygous (Homo) nectin1 F129A mutant mice following PRV infection in experiment 2.
